# Supplementary material
Source: Springer Nature journal article supplement (https://www.springermedizin.de/resource/supplementary/12891_2013_1836_MOESM6_ESM.pdf/9508600)

a

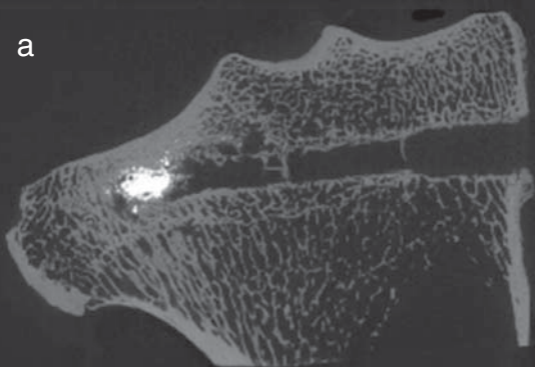

b

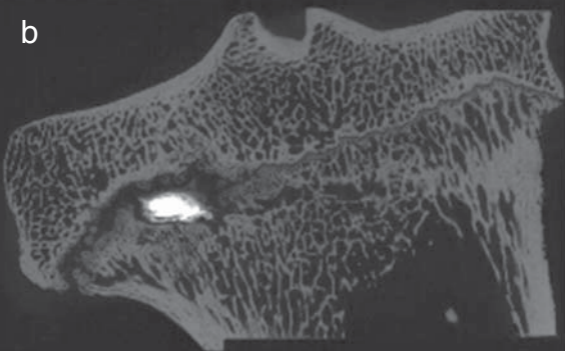

c

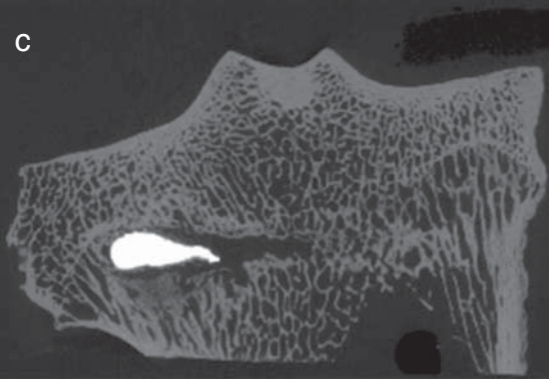

Supplement: MOESM6 [file 9508600]
